# Supplementary material
Source: PubMed Central journal article supplement (PMC7229463)
Supplement: mmc1.pdf [file mmc1.pdf]

## **Supplementary Appendix Table of Contents**

- 1. List of authors - Northwell Nephrology COVID-19 Consortium (page 2)**
- 2. Supplementary Tables: Table S1 and S2 (pages 3-4)**
- 3. Supplementary Figures: Figure S1 (page 5)**

## **Northwell Nephrology COVID-19 Consortium authors**

Mersema Abate, MD, MPH; Hugo Paz Andrade, MD; Richard L. Barnett, MD; Alessandro Bellucci, MD; Madhu C. Bhaskaran, MD; Antonio G. Corona, MD; Bessy Suyin Flores Chang, MD; Mark Finger, MD; Steven Fishbane, MD; Michael Gitman, MD; Candice Halinski, MBA, MHCDS, MSN, NP-C; Shamir Hasan, MD; Azzour D. Hazzan, MD; Jamie S. Hirsch, MD; Susana Hong, MD; Kenar D. Jhaveri, MD; Yuriy Khanin, MD; Aireen Kuan, MD; Varun Madireddy, MD; Deepa Malieckal, MD; Abdulrahman Muzib, MD; Gayatri Nair, MD; Vinay V. Nair, DO; Jia Hwei Ng, MD; Rushang Parikh, MD; Daniel W. Ross, MD, MPH; Vipulbhai Sakhiya, MBBS; Mala Sachdeva, MD; Richard Schwarz, MD; Hitesh H. Shah, MD; Purva Sharma, MD; Pravin C. Singhal, MD; Nupur N. Uppal, MD; Rimda Wanchoo, MD.

## **Affiliations of the Northwell Nephrology COVID-19 Consortium authors**

Division of Kidney Diseases and Hypertension, Donald and Barbara Zucker School of Medicine at Hofstra/Northwell, Great Neck, NY 11021, USA.

| <b>Supplementary Table S1. Baseline laboratory blood results within 48 hours of admission. ¶</b> |                              |                           |                  |
|--------------------------------------------------------------------------------------------------|------------------------------|---------------------------|------------------|
| <b>Variables</b>                                                                                 | <b>No AKI<br/>(N = 3456)</b> | <b>AKI<br/>(N = 1993)</b> | <b>P value *</b> |
| <b>Complete blood count †</b>                                                                    |                              |                           |                  |
| <b>White blood cell count, 1000/µL</b>                                                           | 6.7 (5.1, 9.0)               | 7.5 (5.6, 10.4)           | <0.001           |
| <b>Hemoglobin, g/L</b>                                                                           | 13.5 (12.3, 14.6)            | 13.4 (11.9, 14.6)         | 0.013            |
| <b>Platelet count, 1000/µL</b>                                                                   | 203.0 (159.0, 259.0)         | 195.5 (149.0, 254.0)      | <0.001           |
| <b>Basic metabolic panel †</b>                                                                   |                              |                           |                  |
| <b>Sodium, mmol/L</b>                                                                            | 136.0 (133.0, 138.0)         | 136.0 (132.0, 139.0)      | 0.76             |
| <b>Potassium, mmol/L</b>                                                                         | 4.0 (3.7, 4.4)               | 4.1 (3.7, 4.6)            | <0.001           |
| <b>Chloride, mmol/L</b>                                                                          | 99.0 (96.0, 102.0)           | 99.0 (95.0, 103.0)        | 0.672            |
| <b>Carbon Dioxide, mmol/L</b>                                                                    | 24.0 (22.0, 26.0)            | 23.0 (20.0, 25.0)         | <0.001           |
| <b>Blood Urea Nitrogen, mg/dL</b>                                                                | 14.0 (10.0, 20.0)            | 23.0 (14.75, 37.0)        | <0.001           |
| <b>Creatinine, mg/dL</b>                                                                         | 0.95 [0.77, 1.16]            | 1.23 (0.91, 1.8)          | <0.001           |
| <b>Glucose, mg/dL</b>                                                                            | 118.0 (104.0, 146.0)         | 137.0 (115.00, 191.0)     | <0.001           |
| <b>Total Calcium, mg/dL</b>                                                                      | 8.8 (8.5, 9.1)               | 8.70 (8.40, 9.1)          | <0.001           |
| <b>Liver Function Test †</b>                                                                     |                              |                           |                  |
| <b>Alanine Aminotransferase, U/L</b>                                                             | 34.0 (22.0, 57.0)            | 34.0 (22.0, 53.0)         | 0.16             |
| <b>Aspartate Aminotransferase, U/L</b>                                                           | 44.0 (30.0, 67.0)            | 52.0 (35.0, 79.0)         | <0.001           |
| <b>Alkaline Phosphatase, U/L</b>                                                                 | 70.0 (56.0, 90.0)            | 73.5 (59.0, 95.8)         | <0.001           |
| <b>Albumin, g/L</b>                                                                              | 3.5 (3.2, 3.9)               | 3.4 (2.9, 3.8)            | <0.001           |
| <b>Total Bilirubin mg/dL</b>                                                                     | 0.5 (0.4, 0.7)               | 0.5 (0.4, 0.7)            | <0.001           |
| <b>Lactate Dehydrogenase, U/L</b>                                                                | 370.0 (283.5, 496.0)         | 480.0 (354.0, 646.0)      | §                |
| <b>Missing (%)</b>                                                                               | 1313 (40.0)                  | 702 (35.2)                |                  |
| <b>Creatine Kinase, U/L</b>                                                                      | 148.0 (79.0, 308.0)          | 234.5 (113.8, 592.3)      | §                |
| <b>Missing (%)</b>                                                                               | 2300 (70.0)                  | 1121 (56.3)               |                  |
| <b>Procalcitonin, ng/mL</b>                                                                      | 0.15 (0.08, 0.32)            | 0.33 (0.15, 0.90)         | §                |
| <b>Missing (%)</b>                                                                               | 1171 (30.0)                  | 601 (30.2)                |                  |
| <b>Ferritin, ng/mL</b>                                                                           | 722.0 (364.0, 1324.0)        | 867.0 (495.0, 1554.0)     | §                |
| <b>Missing (%)</b>                                                                               | 1083 (30.0)                  | 612 (30.7)                |                  |
| <b>Lactate, mmol/L</b>                                                                           | 1.4 (1.1, 1.9)               | 1.7 (1.3, 2.4)            | §                |
| <b>Missing (%)</b>                                                                               | 2188 (60.0)                  | 1000 (50.2)               |                  |
| <b>C-reactive Protein, mg/dL</b>                                                                 | 11.5 (5.7, 24.3)             | 15.5 (8.3, 29.0)          | §                |
| <b>Missing (%)</b>                                                                               | 998 (30.0)                   | 522 (26.2)                |                  |
| <b>D-Dimer assay, ng/mL</b>                                                                      | 342.0 (223.0, 582.0)         | 525.0 (314.00, 1075.0)    | §                |
| <b>Missing (%)</b>                                                                               | 1859 (50.0)                  | 936 (47.0)                |                  |

¶ Data are expressed as medians (interquartile ranges).  
† Missing data was <1%  
\* Comparisons are made between No AKI and AKI using nonparametric Kruskal Wallis test for continuous variables.  
§ Due to the amount of missing data, we did not make comparison between No AKI and AKI.

**Supplementary Table S2. Comparison analysis of risk factors associated with the development of acute kidney injury when including BMI in the multivariate logistic regression model vs excluding BMI in the model.**

| Variable                                 | Including BMI in Model |            |           | Excluding BMI in Model |           |           |
|------------------------------------------|------------------------|------------|-----------|------------------------|-----------|-----------|
|                                          | Adjusted OR ‡          | 95% CI     | P Value   | Adjusted OR ‡          | 95% CI    | P Value   |
| <b>Age, years</b>                        | 1.03                   | 1.03-1.04  | < 0.001*  | 1.03                   | 1.03-1.04 | < 0.001*  |
| <b>Male</b>                              | 1.14                   | 0.97-1.33  | 0.10      | 1.13                   | 0.97-1.32 | 0.07      |
| <b>White race</b>                        | Reference              | Reference  | Reference | Reference              | Reference | Reference |
| <b>Asian</b>                             | 0.83                   | 0.61-1.12  | 0.23      | 0.81                   | 0.60-1.10 | 0.17      |
| <b>Black</b>                             | 1.23                   | 1.01-1.50  | 0.04*     | 1.23                   | 1.01-1.51 | 0.04*     |
| <b>Other/ mixed</b>                      | 0.84                   | 0.69-1.03  | 0.09      | 0.84                   | 0.68-1.02 | 0.08      |
| <b>Unknown</b>                           | 0.74                   | 0.50-1.11  | 0.15      | 0.74                   | 0.49-1.10 | 0.13      |
| <b>Tertiary Hospital</b>                 | 0.90                   | 0.77-1.06  | 0.20      | 0.90                   | 0.76-1.05 | 0.19      |
| <b>Diabetes mellitus</b>                 | 1.76                   | 1.49-2.07  | <0.001*   | 1.77                   | 1.50-2.08 | < 0.001*  |
| <b>Hypertension</b>                      | 1.25                   | 1.04-1.50  | 0.02*     | 1.26                   | 1.04-1.51 | 0.02*     |
| <b>Cardiovascular Disease ¶</b>          | 1.48                   | 1.22-1.80  | <0.001*   | 1.48                   | 1.22-1.80 | <0.001*   |
| <b>Obesity (BMI ≥30kg/m<sup>2</sup>)</b> | 1.11                   | 0.94-1.31  | 0.22      | –                      | –         | –         |
| <b>Cancer</b>                            | 1.09                   | 0.82-1.45  | 0.54      | 1.10                   | 0.82-1.46 | 0.53      |
| <b>Mechanical ventilation</b>            | 10.7                   | 6.81-16.70 | < 0.001*  | 10.7                   | 6.83-16.8 | < 0.001*  |
| <b>Vasoactive medication §</b>           | 4.53                   | 2.88-7.13  | < 0.001*  | 4.55                   | 2.89-7.17 | < 0.001*  |
| <b>ACE-I or ARB use</b>                  | 0.87                   | 0.73-1.04  | 0.12      | 0.88                   | 0.73-1.04 | 0.14      |

Abbreviation: ACE-I, Angiotensin-converting enzyme inhibitor; ARB, Angiotensin II receptor blocker; BMI, body mass index; OR, odds ratio.

¶ Cardiovascular diseases include coronary artery disease, heart failure and peripheral vascular disease.

§ Vasoactive medications include inotropes and vasopressors.

‡ Variables were entered into the model when the alpha level of risk factor was less than 0.15. Age, gender and race were added into the model regardless of alpha level.

\* Independent risk factors include increased age, Black race, diabetes mellitus, hypertension, cardiovascular disease, mechanical ventilation, and vasoactive medication.

# Detecting acute kidney injury (AKI) algorithm

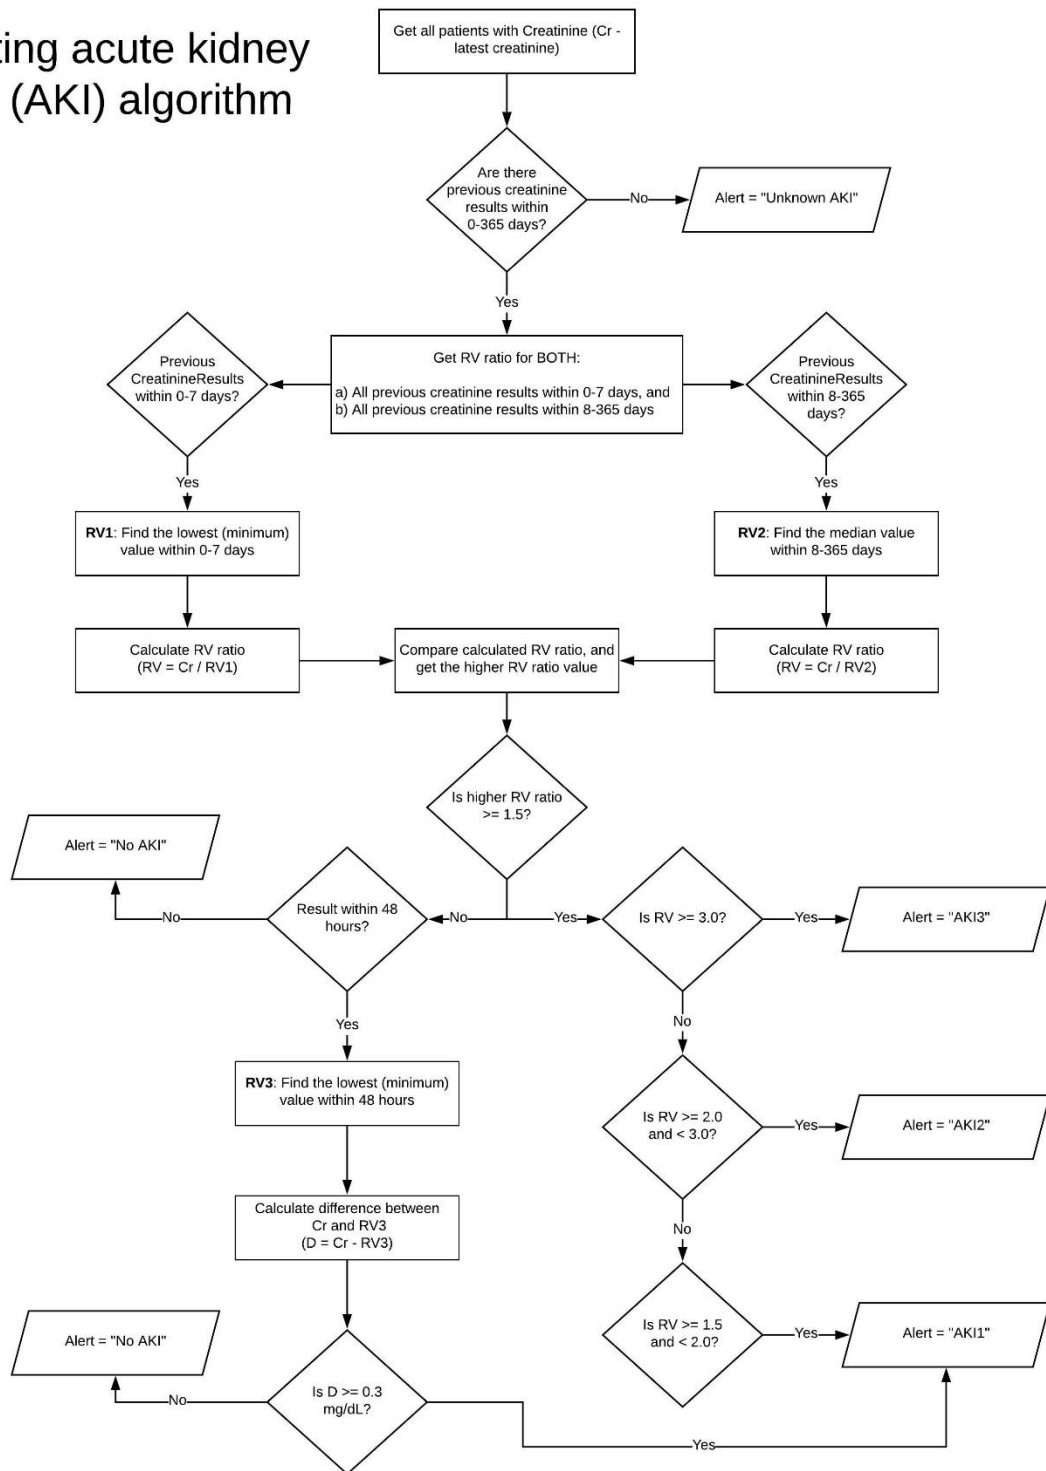

**Supplementary Figure S1. Algorithm for detecting AKI using electronic health records.**

Abbreviations: AKI, acute kidney injury; D, difference, RV, reference value.
